# Supplementary material for: Increased Macrophages and C1qA, C3, C4 Transcripts in the Midbrain of People With Schizophrenia
Source: PubMed Central journal article supplement (PMC7550636; doi:10.3389/fimmu.2020.02002), 2020-09-29
Supplement: Image_2.pdf [file Image_2.pdf]

## Supplementary Figure 2

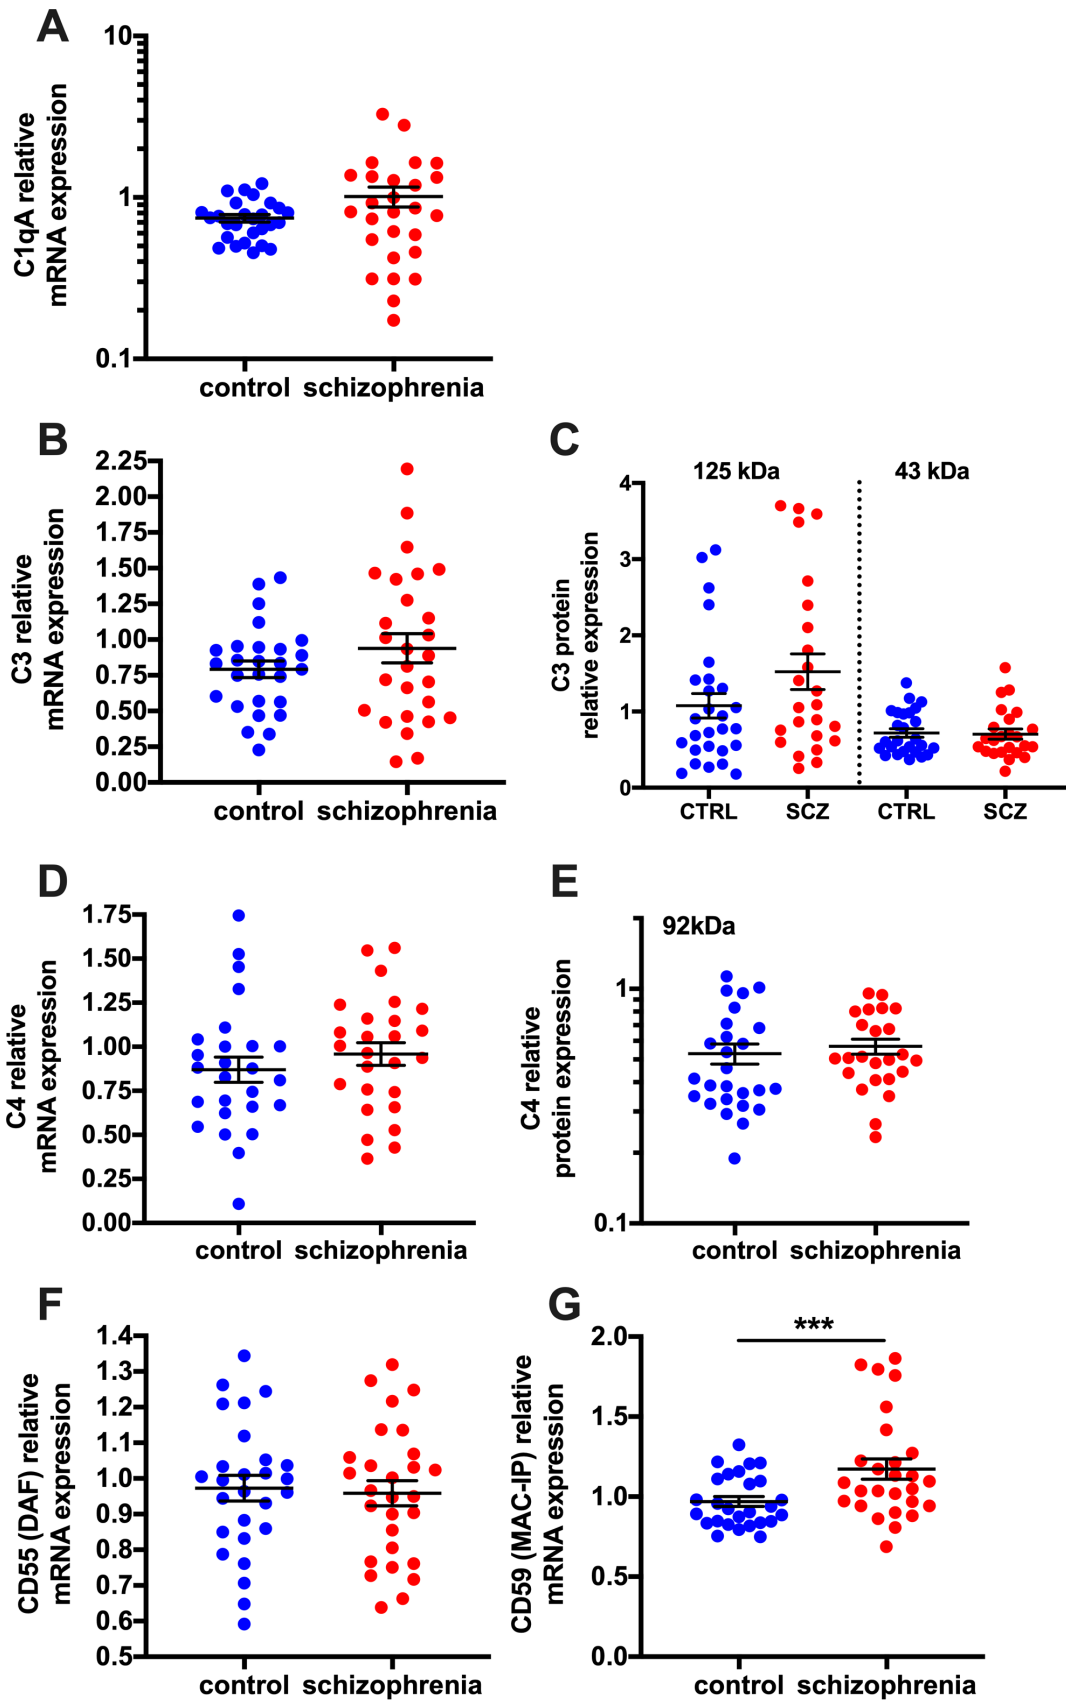

**Supplementary Figure 2. Complement pathway-related transcripts and protein in the midbrain in schizophrenia cases and controls.**

(A) Gene expression of the complement cascade initiator molecule, C1qA was not changed by diagnosis ( $F = 0.49$ ,  $df=51,1$ ,  $p = 0.49$ ). (B) C3 mRNA ( $F=1.71$ ,  $df=51,1$ ,  $p = 0.20$ , covaried for age) and (C) C3 protein levels (125 kDa:  $t = -1.57$ ,  $df = 49$ ; 43 kDa:  $t = -0.033$ ,  $df = 47$ , both  $p > 0.05$ ) were unchanged by diagnosis. (D) C4 mRNA ( $t = -0.93$ ,  $df = 50$ ,  $p = 0.36$ ) and (E) C4 protein levels ( $t = -1.57$ ,  $df = 49$ ,  $p = 0.12$ ) were unchanged by diagnosis. (F) CD55 mRNA was unchanged by diagnosis ( $t = 0.27$ ,  $df = 53$ ,  $p = 0.79$ ) and (G) CD59 was increased in schizophrenia cases compared to controls ( $F = 10.89$ ,  $df = 53,1$ ,  $p = 0.002$ ). Data are mean  $\pm$  SEM, \*\*\*  $p < 0.001$ .
